# Supplementary material for: Growth of the Digital Footprint of the Society of Critical Care Medicine Annual Congress: 2014–2020
Source: PubMed Central journal article supplement — Crit Care Explor. 2020 Nov 12;2(11):e0252. doi: 10.1097/CCE.0000000000000252 (PMC7665246; doi:10.1097/cce.0000000000000252), 2020-11-12
Supplement: cc9-2-e0252-s001.pdf [file cc9-2-e0252-s001.pdf]

### Supplemental Digital Content 1. Congress Dates

| <b>Year</b> | <b>Congress</b> | <b>Posted Dates of Congress</b> | <b>Dates of Analysis</b>        |
|-------------|-----------------|---------------------------------|---------------------------------|
| 2014        | #CCC43          | Thurs Jan 9 – Mon Jan 13, 2014  | Wed Jan 8 – Tues Jan 14, 2014   |
| 2015        | #CCC44          | Sat Jan 17 – Wed Jan 21, 2015   | Fri Jan 16 – Thurs Jan 22, 2015 |
| 2016        | #CCC45          | Sat Feb 20 – Wed Feb 24, 2016   | Fri Feb 19 – Thurs Feb 25, 2016 |
| 2017        | #CCC46          | Sat Jan 21 – Wed Jan 25, 2017   | Fri Jan 20 – Thurs Jan 26, 2017 |
| 2018        | #CCC47          | Sat Feb 24 – Wed Feb 28, 2018   | Fri Feb 23 – Thurs Mar 1, 2018  |
| 2019        | #CCC48          | Sat Feb 16 – Wed Feb 20, 2019   | Fri Feb 15 – Thurs Feb 21, 2019 |
| 2020        | #CCC49          | Sat Feb 15 – Wed Feb 19, 2020   | Fri Feb 14 – Thurs Feb 20, 2020 |
