# Supplementary figures and images for: Growth of the Digital Footprint of the Society of Critical Care Medicine Annual Congress: 2014–2020
Source: PubMed Central journal article supplement — Crit Care Explor. 2020 Nov 12;2(11):e0252. doi: 10.1097/CCE.0000000000000252 (PMC7665246; doi:10.1097/cce.0000000000000252), 2020-11-12

## Supplemental Digital Content 2: Overall Twitter Metrics Over Time

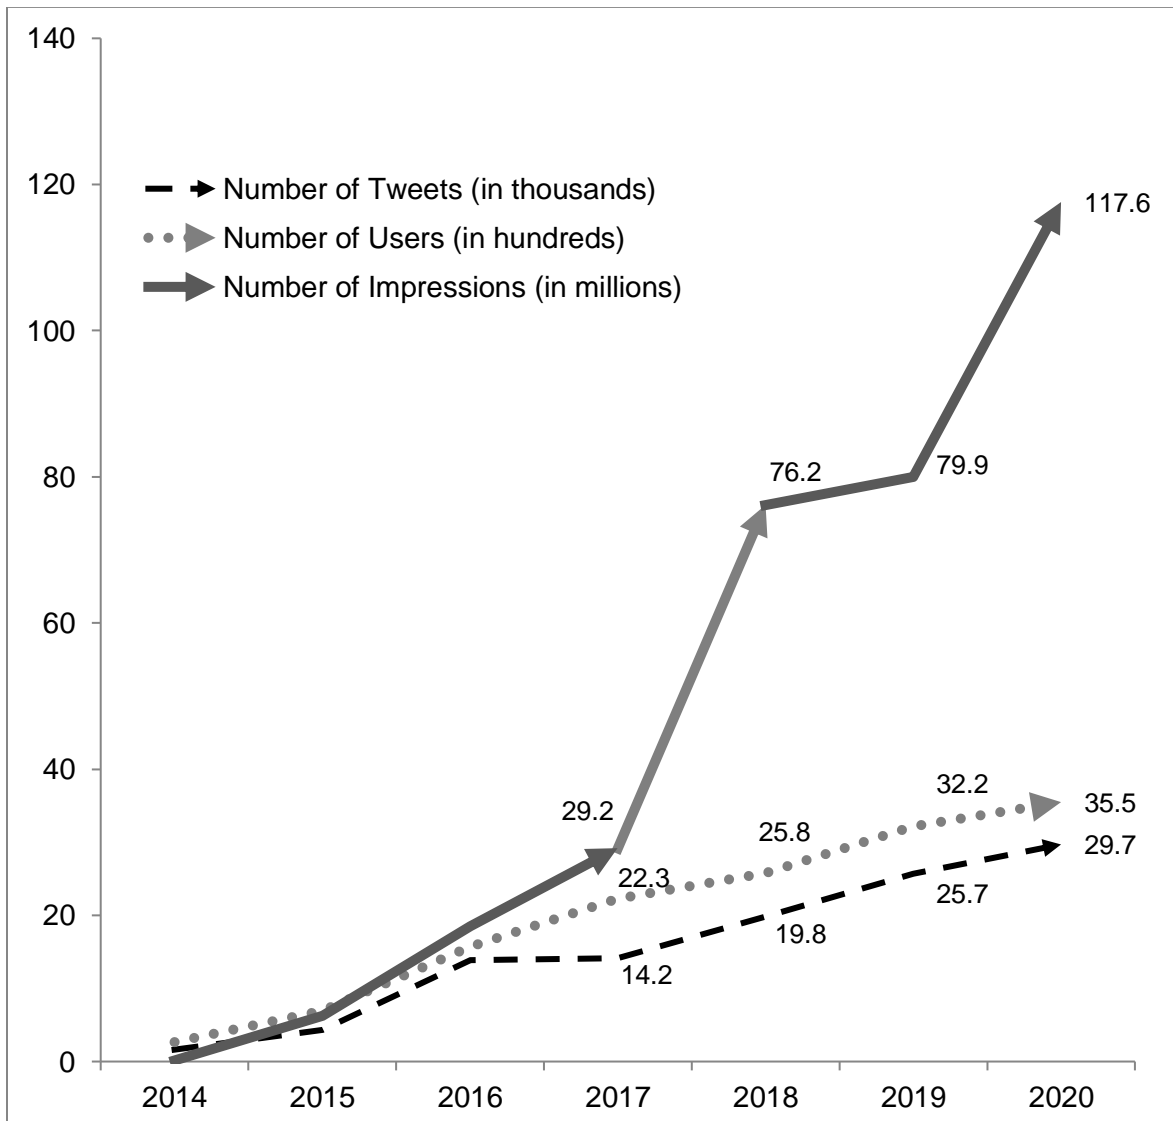

Supplement: cc9-2-e0252-s002.pdf [file cc9-2-e0252-s002.pdf]

### Supplemental Digital Content 3. Characteristics of Tweets Over Time

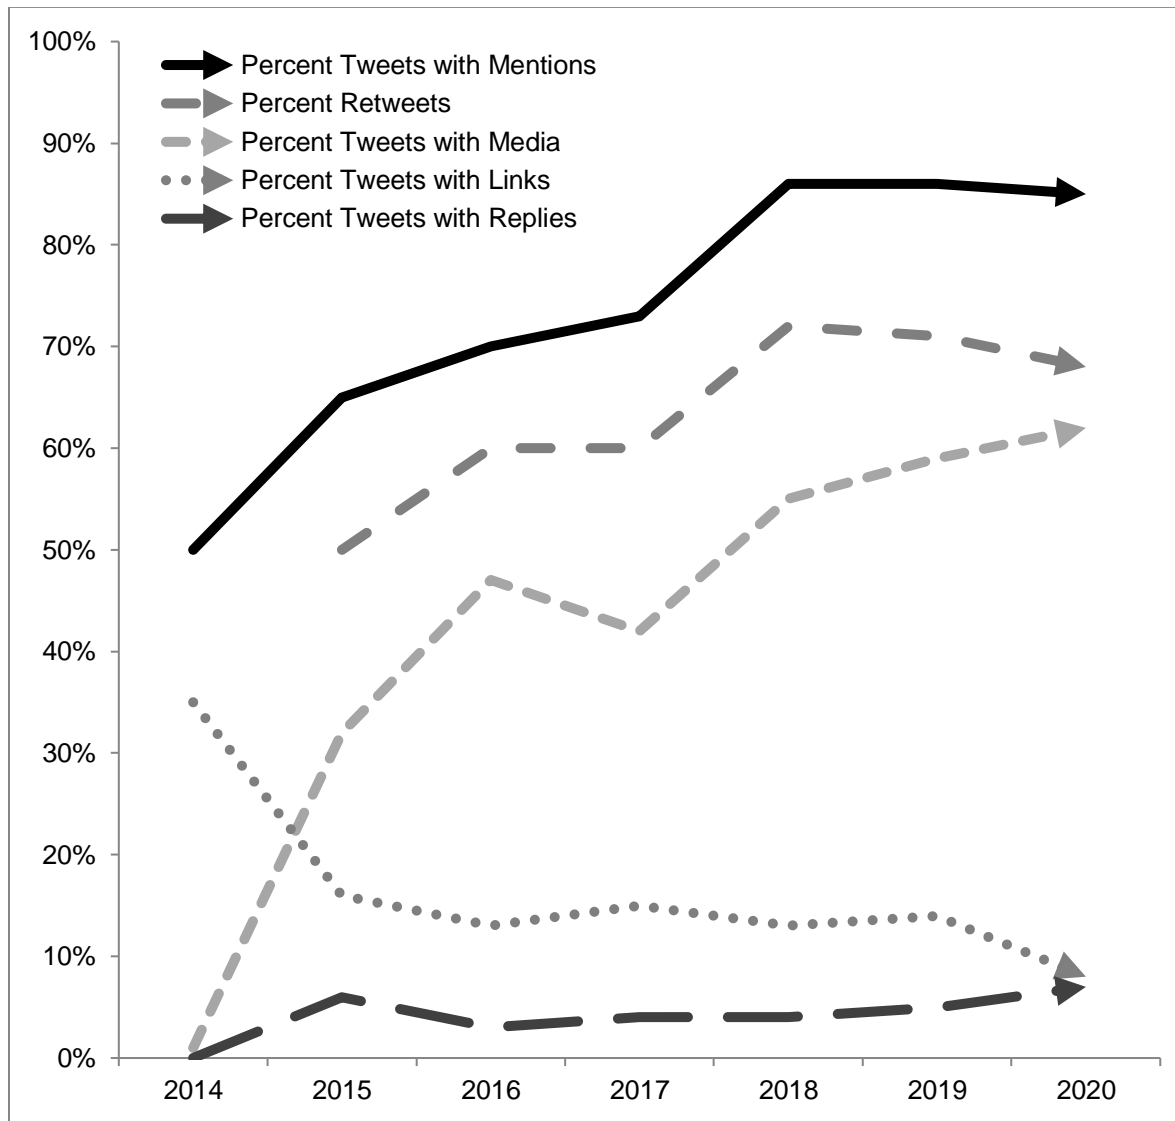

Supplement: cc9-2-e0252-s003.pdf [file cc9-2-e0252-s003.pdf]
